# Supplementary material for: Imaging and haemodynamic parameters associated with clinical outcomes following isolated tricuspid valve surgery
Source: PubMed Central journal article supplement — Open Heart. 2022 Dec 15;9(2):e002124. doi: 10.1136/openhrt-2022-002124 (PMC9756202; doi:10.1136/openhrt-2022-002124), 2022-12-15
Supplement: openhrt-2022-002124supp001.pdf [file openhrt-2022-002124supp001.pdf]

## Association of Preoperative Imaging and Invasive Hemodynamic Measures with Outcomes Following Isolated Tricuspid Valve Surgery

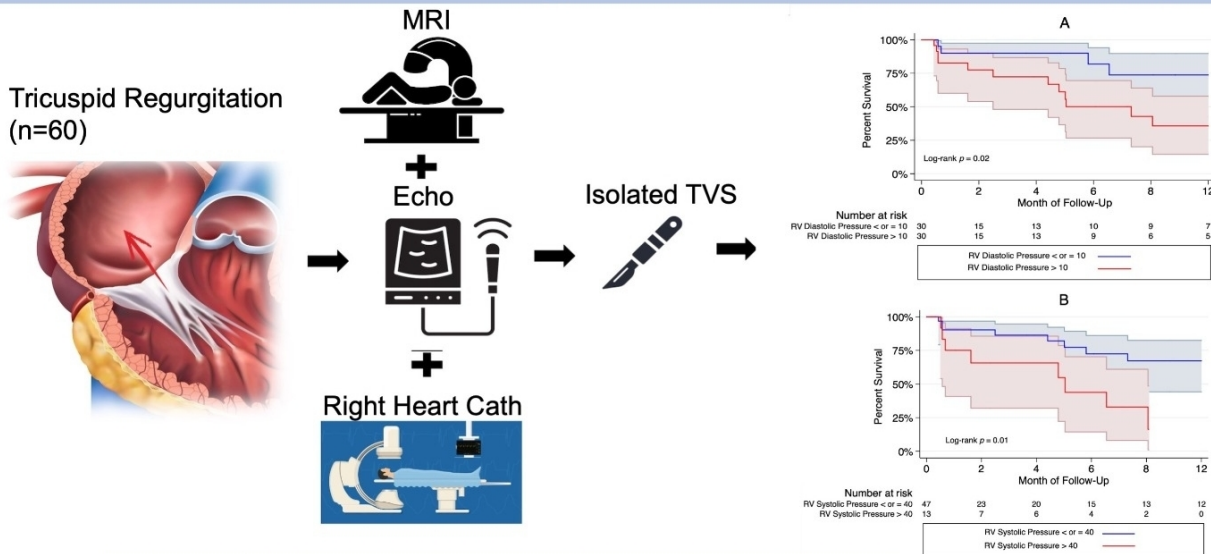

Data derived from right heart catheterization, specifically right ventricular (RV) systolic and diastolic pressures, are associated with postoperative mortality and CHF following isolated tricuspid valve surgery (TVS)
