# Supplementary figures and images for: Imaging and haemodynamic parameters associated with clinical outcomes following isolated tricuspid valve surgery
Source: PubMed Central journal article supplement — Open Heart. 2022 Dec 15;9(2):e002124. doi: 10.1136/openhrt-2022-002124 (PMC9756202; doi:10.1136/openhrt-2022-002124), 2022-12-15

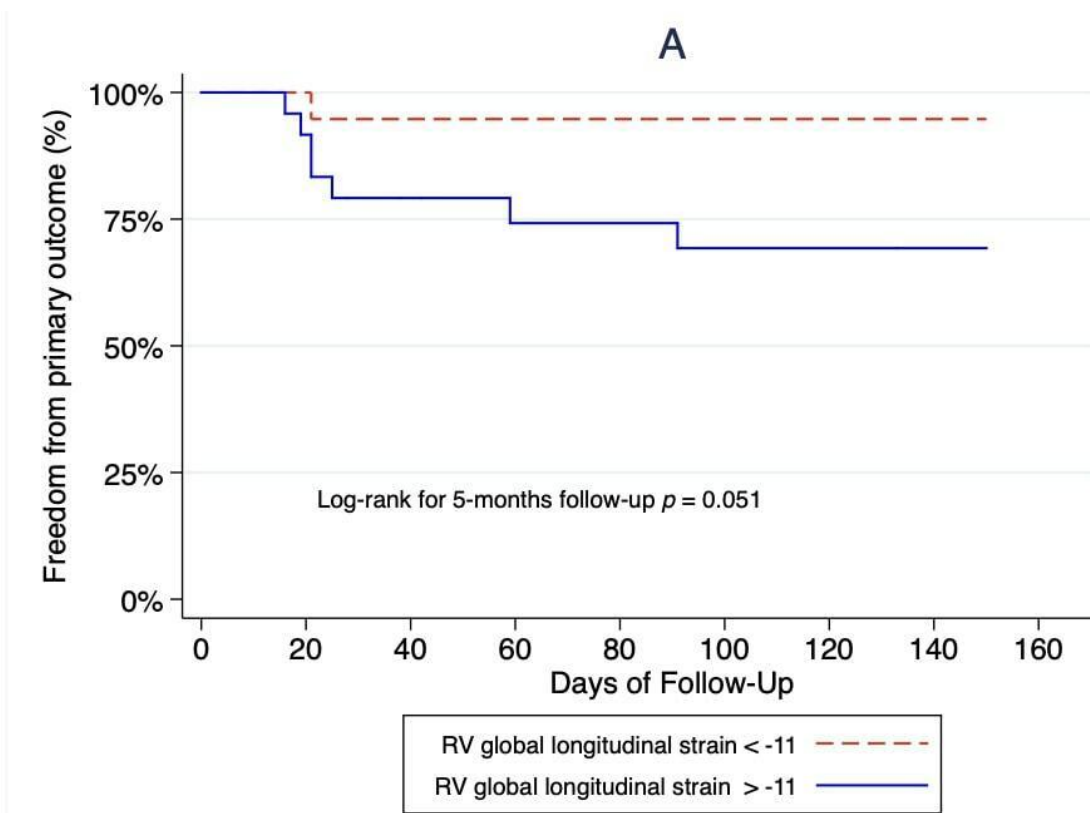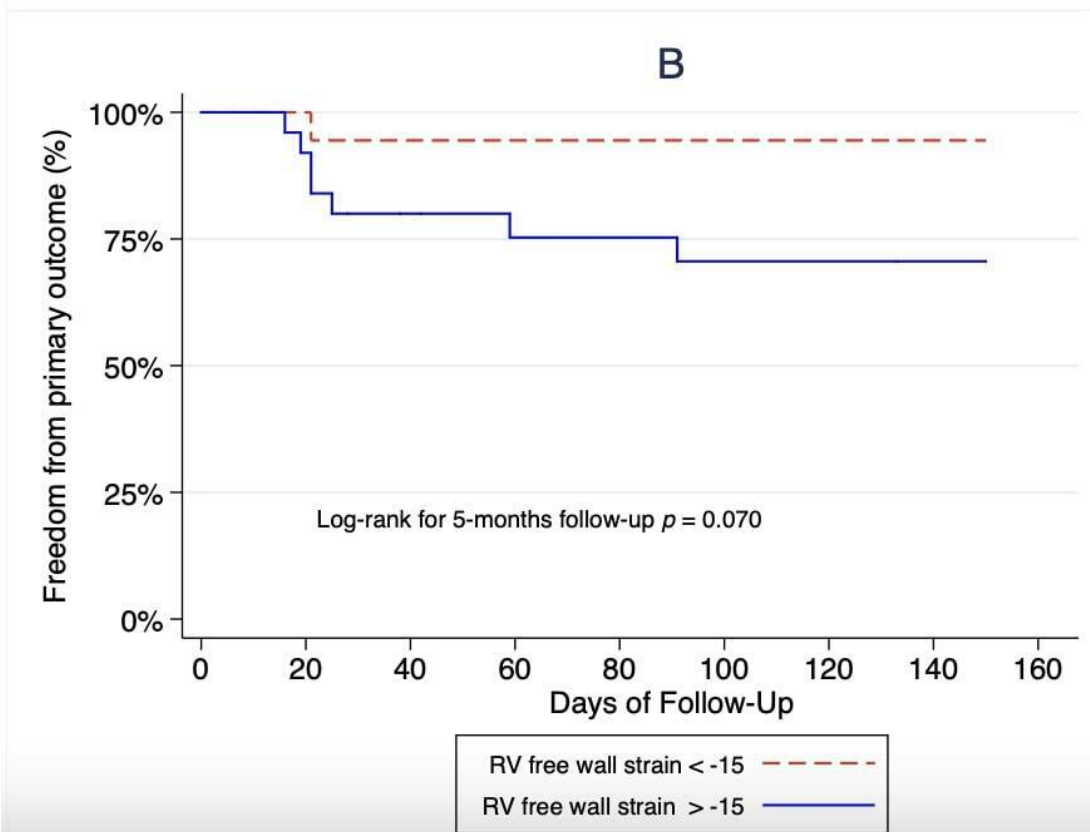

Supplement: openhrt-2022-002124supp002.pdf [file openhrt-2022-002124supp002.pdf]
